# Supplementary material for: Formation of C3H2, C5H2, C7H2, and C9H2 from reactions of CH, C3H, C5H, and C7H radicals with C2H2
Source: Royal Society of Chemistry journal article supplement (doi:10.1039/c5cp06072a), 2015-12-08
Supplement: c5cp06072a1.pdf [file c5cp06072a1.pdf]

# Formation of $C_3H_2$ , $C_5H_2$ , $C_7H_2$ , and $C_9H_2$ from Reactions of CH, $C_3H$ , $C_5H$ , and $C_7H$ Radicals with $C_2H_2$

*Yi-Lun Sun, Wen-Jian Huang, and Shih-Huang Lee\**

Scientific Research Division, National Synchrotron Radiation Research Center, 101 Hsin-Ann  
Road, Hsinchu Science Park, Hsinchu 30076, Taiwan

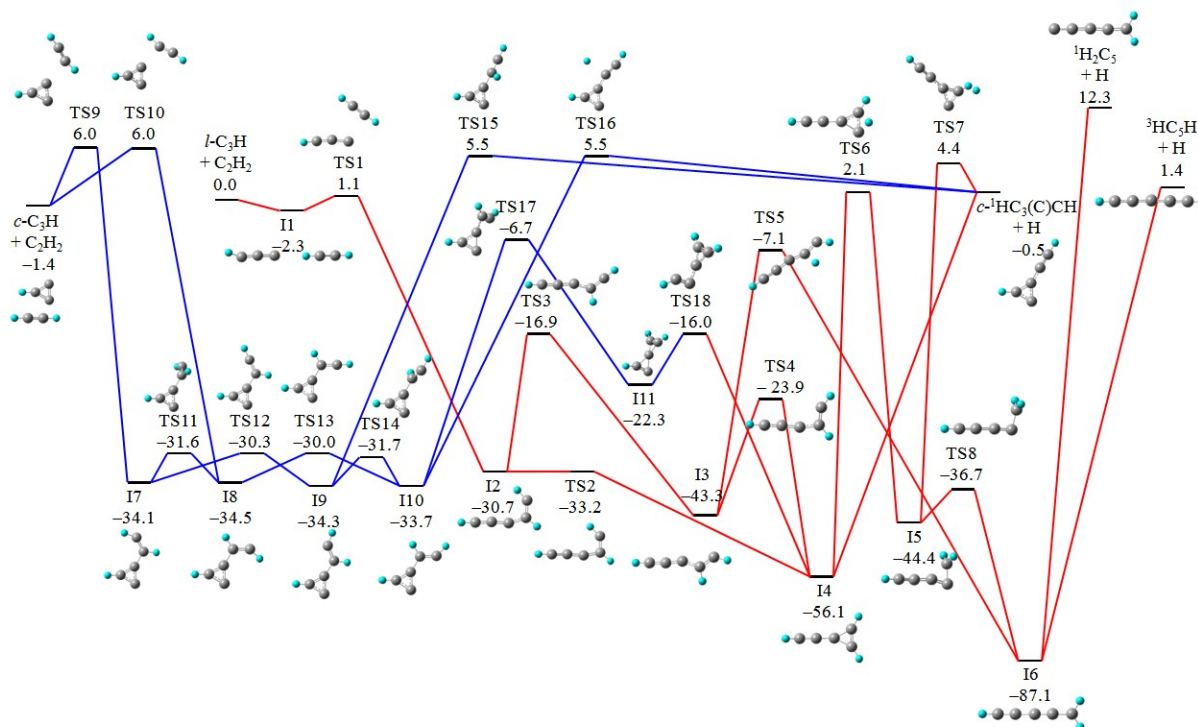

Figure S1. Potential-energy surface of the reaction  $\text{C}_3\text{H} + \text{C}_2\text{H}_2 \rightarrow \text{C}_5\text{H}_2 + \text{H}$ . The red (blue) line is for the linear (cyclic)  $\text{C}_3\text{H}$  reaction. The molecular structures are presented along with the corresponding potential-energy levels. The relative potential energies are given in  $\text{kcal mol}^{-1}$ . An intermediate is labeled with  $\text{I}\#$  and a transition structure is labeled with  $\text{TS}\#$ .  $\text{TS2}$  lies above  $\text{I2}$  at the B3LYP/aug-cc-pVDZ level but  $\text{TS2}$  becomes below  $\text{I2}$  at the level of CCSD(T)/aug-cc-pVTZ + ZPE, indicating that  $\text{TS2}$  is negligible at the latter level of theory.

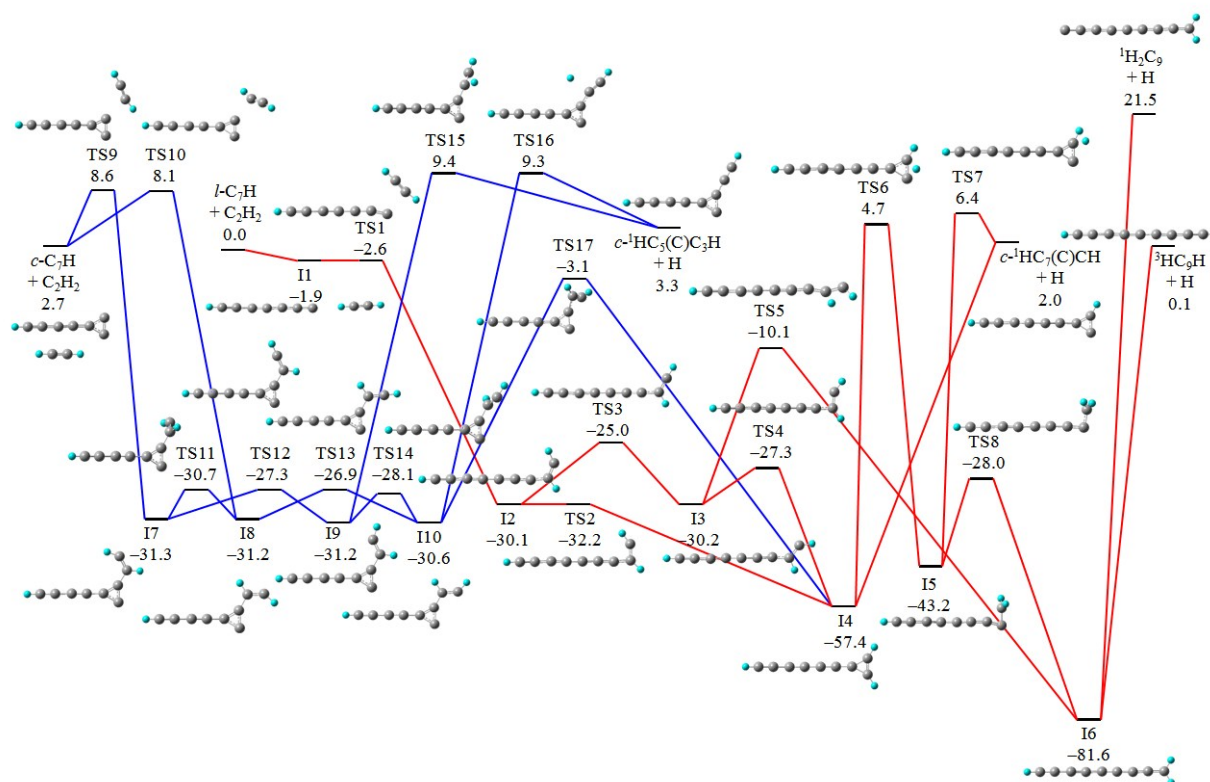

Figure S2. Potential-energy surface of the reaction  $C_7H + C_2H_2 \rightarrow C_9H_2 + H$ . The red (blue) line is for the linear (cyclic)  $C_7H$  reaction. The molecular structures are presented along with the corresponding potential-energy levels. The relative potential energies are given in kcal mol<sup>-1</sup>. An intermediate is labeled with I# and a transition structure is labeled with TS#. TS1 (TS2) lies above I1 (I2) at the B3LYP/aug-cc-pVDZ level but TS1 (TS2) becomes below I1 (I2) at the level of CCSD(T)/aug-cc-pVTZ + ZPE, indicating that TS1 (TS2) is negligible at the latter level of theory. Compared with the  $C_3H + C_2H_2$  (or  $C_5H + C_2H_2$ ) reaction, I11 and TS18 cannot be optimized in the  $C_7H + C_2H_2$  reaction. The calculation of intrinsic reaction coordinate (IRC) also confirms the absences of I11 and TS18 in the  $C_7H + C_2H_2$  reaction.
